# Supplementary material for: Arginine and Carnitine Metabolites Are Altered in Diabetic Retinopathy
Source: PubMed Central journal article supplement — Invest Ophthalmol Vis Sci. 2019 Jul;60(8):3119–26. doi: 10.1167/iovs.19-27321 (PMC6645705; doi:10.1167/iovs.19-27321), 2019-07
Supplement: iovs-60-08-16_s01.pdf [file iovs-60-08-16_s01.pdf]

**Supplemental Table S1: Discriminating features between DR patients and diabetic controls that were assigned tentative annotations with medium or high confidence level using xMSannotator**

Features were selected using PLS-DA (VIP  $\geq 2$ ) and were significantly associated ( $p < 0.05$ ) with DR status in linear regression analyses adjusting for age, sex, diabetes duration, and hemoglobin A1c. Fold change presented as diabetic controls/DR patients. Features were annotated by xMSannotator with medium or high confidence. All metabolites matches are M+H adducts unless otherwise specified.

| <i>m/z</i> | Retention Time (seconds) | VIP   | Fold Change | HMDB Match (Chemical ID)                                                                                                                                                                                                                                                                                                                                                                                                                                                                                                                                                                                                                                                                                                                                                                                                                                         |
|------------|--------------------------|-------|-------------|------------------------------------------------------------------------------------------------------------------------------------------------------------------------------------------------------------------------------------------------------------------------------------------------------------------------------------------------------------------------------------------------------------------------------------------------------------------------------------------------------------------------------------------------------------------------------------------------------------------------------------------------------------------------------------------------------------------------------------------------------------------------------------------------------------------------------------------------------------------|
| 219.0830   | 47.0                     | 2.966 | 1.292       | L-Arginine (HMDB00517) [M+2Na-H], D-Arginine (HMDB03416)[M+2Na-H], 1-(2-Thienyl)-1-heptanone (HMDB40241) [M+Na]                                                                                                                                                                                                                                                                                                                                                                                                                                                                                                                                                                                                                                                                                                                                                  |
| 175.1191   | 47.9                     | 2.778 | 1.262       | L-Arginine (HMDB00517), D-Arginine (HMDB03416)                                                                                                                                                                                                                                                                                                                                                                                                                                                                                                                                                                                                                                                                                                                                                                                                                   |
| 276.1462   | 343.6                    | 2.664 | 1.445       | Glutaryl carnitine (HMDB13130)                                                                                                                                                                                                                                                                                                                                                                                                                                                                                                                                                                                                                                                                                                                                                                                                                                   |
| 176.1030   | 56.8                     | 2.613 | 1.440       | Argininic acid (HMDB03148), Citrulline (HMDB00904)                                                                                                                                                                                                                                                                                                                                                                                                                                                                                                                                                                                                                                                                                                                                                                                                               |
| 1111.2909  | 47.8                     | 2.547 | 0.916       | Kaempferol 3-O-feruloyl-caffeoyl-sophoroside 7-O-glucoside (HMDB29266)                                                                                                                                                                                                                                                                                                                                                                                                                                                                                                                                                                                                                                                                                                                                                                                           |
| 270.2795   | 352.8                    | 2.429 | 1.540       | Capsiamide (HMDB40940)                                                                                                                                                                                                                                                                                                                                                                                                                                                                                                                                                                                                                                                                                                                                                                                                                                           |
| 193.0989   | 58.8                     | 2.372 | 0.645       | Hydroxycotinine (HMDB01390), 5-Hydroxycotinine (HMDB01427), Cotinine N-oxide (HMDB01411), Oxoamide (HMDB01004), N-Hydroxymethylnorcotinine (HMDB01324)                                                                                                                                                                                                                                                                                                                                                                                                                                                                                                                                                                                                                                                                                                           |
| 796.5849   | 437.0                    | 2.353 | 0.439       | PE(20:1(11Z)20:3(8Z11Z14Z)) (HMDB09266), PE(18:3(6Z9Z12Z)22:1(13Z)) (HMDB09139), PE(22:1(13Z)18:3(6Z9Z12Z)) (HMDB09523), PE(20:2(11Z14Z)20:2(11Z14Z)) (HMDB09297), PE(20:1(11Z)20:3(5Z8Z11Z)) (HMDB09265), PE(18:3(9Z12Z15Z)22:1(13Z)) (HMDB09172), PE(22:4(7Z10Z13Z16Z)18:0) (HMDB09585), PE(22:2(13Z16Z)18:2(9Z12Z)) (HMDB09555), PE(18:4(6Z9Z12Z15Z)22:0) (HMDB09204), PC(22:4(7Z10Z13Z16Z)15:0) (HMDB08625), PE(18:2(9Z12Z)22:2(13Z16Z)) (HMDB09107), PE(22:1(13Z)18:3(9Z12Z15Z)) (HMDB09524), PE(18:022:4(7Z10Z13Z16Z)) (HMDB09009), PE(20:3(8Z11Z14Z)20:1(11Z)) (HMDB09362), PE(20:3(5Z8Z11Z)20:1(11Z)) (HMDB09329), PE(20:4(5Z8Z11Z14Z)20:0) (HMDB09394), PE(20:4(8Z11Z14Z17Z)20:0) (HMDB09427), PE(22:018:4(6Z9Z12Z15Z)) (HMDB09492), PC(15:022:4(7Z10Z13Z16Z)) (HMDB07955), PE(20:020:4(5Z8Z11Z14Z)) (HMDB09234), PE(20:020:4(8Z11Z14Z17Z)) (HMDB09235) |
| 214.0564   | 50.9                     | 2.338 | 1.695       | 3-Methylhistidine (HMDB00479), 1-Methylhistidine (HMDB00001)                                                                                                                                                                                                                                                                                                                                                                                                                                                                                                                                                                                                                                                                                                                                                                                                     |
| 220.0668   | 53.4                     | 2.176 | 1.320       | Argininic acid (HMDB03148) [M+2Na-H], Citrulline (HMDB00904) [M+2Na-H]                                                                                                                                                                                                                                                                                                                                                                                                                                                                                                                                                                                                                                                                                                                                                                                           |

|           |       |       |       |                                                                                                                                                                                                                                                                                                                                                                                                                                                                                                                                                                                                                                                                                                                                                                                                                                                                                                                                                                                                                                                                                                                                                                                                                                                                                                                                                                                                                                                                                                                                                                                                                                                                                                                                                                                                                                                                                                             |
|-----------|-------|-------|-------|-------------------------------------------------------------------------------------------------------------------------------------------------------------------------------------------------------------------------------------------------------------------------------------------------------------------------------------------------------------------------------------------------------------------------------------------------------------------------------------------------------------------------------------------------------------------------------------------------------------------------------------------------------------------------------------------------------------------------------------------------------------------------------------------------------------------------------------------------------------------------------------------------------------------------------------------------------------------------------------------------------------------------------------------------------------------------------------------------------------------------------------------------------------------------------------------------------------------------------------------------------------------------------------------------------------------------------------------------------------------------------------------------------------------------------------------------------------------------------------------------------------------------------------------------------------------------------------------------------------------------------------------------------------------------------------------------------------------------------------------------------------------------------------------------------------------------------------------------------------------------------------------------------------|
| 171.1380  | 402.3 | 2.163 | 0.894 | (-)-6-Methyl-5-hepten-2-yl acetate (HMDB30031), xi-Tetrahydro-3-pentyl-2H-pyran-2-one (HMDB37632), Methyl (xi)-3-nonenoate (HMDB29859), 2-Hexenyl butanoate (HMDB34581), 2-Hydroxycineol (HMDB59852), trans-p-Menth-2-ene-14-diol (HMDB37021), cis-4-Decenoic acid (HMDB04980), Hexyl crotonate (HMDB36211), Isopentyl 3-methyl-2-butenate (HMDB40530), 8-Methylnonenoate (HMDB12183), 1-Cyclopropyl-4-methyl-13-cyclohexanediol (HMDB36992), Ethyl 4Z-octenoate (HMDB39795), 26-Dimethyl-37-octadiene-26-diol (HMDB36990), Ethyl 3-octenoate (HMDB32275), cis-3-Hexenyl isobutyrate (HMDB40213), (-)-trans-Linalyl oxide (HMDB40727), Ethyl (E)-2-octenoate (HMDB37497), (E)-3-(Tetrahydro-55-dimethyl-2-furanyl)-2-buten-1-ol (HMDB35839), trans-Dec-2-enoic acid (HMDB10726), 3-Methyl-24-nonanedione (HMDB34880), 9-Hydroxygeraniol (HMDB38744), 5-Decenoic acid (HMDB39768), (-)-cis-Linalool 37-oxide (HMDB41630), Citronellal acid (HMDB35837), Linalool oxide (trans-pyranoid) (HMDB31440), xi-5-Hexyldihydro-2(3H)-furanone (HMDB37217), (-)-6-Hydroxy-26-dimethyl-7-octen-4-one (HMDB39149), 9-Decenoic acid (HMDB31003), Lilac alcohol (HMDB36099), 1-Octen-3-yl acetate (HMDB32452), 6-Decenoic acid (HMDB41012), (-)-cis-Linalyl oxide (HMDB40726), Cyclohexylethyl acetate (HMDB31362), cis-3-Hexenyl butyrate (HMDB33377), Linalool oxide III (HMDB31441), 2-Exo-hydroxy-18-cineole (HMDB59610), Methyl 2-nonenoate (HMDB40194), 5Z-Octenyl acetate (HMDB29358), 3-Decenoic acid (HMDB31002), Cnidiol C (HMDB35365), 4-Hydroxy-26-dimethyl-7-octen-3-one (HMDB32119), delta-Decalactone (HMDB37116), 2-Propenyl heptanoate (HMDB40208), 2-Octenyl acetate (HMDB31297), Cyclohexyl butanoate (HMDB34427), 6-Decanolide (HMDB33203), Menthone lactone (HMDB40330), (SE)-26-Dimethyl-57-octadiene-23-diol (HMDB35122), 2-Methylbutyl 3-methyl-2-butenate (HMDB32393), Linalyl oxide (HMDB35907) |
| 367.0294  | 53.5  | 2.156 | 0.884 | 3-O-Galloyl-14-galactarolactone (HMDB37201), Molybdopterin precursor Z (HMDB11683), 5-O-Galloyl-14-galactarolactone (HMDB37202), 2-O-Galloyl-14-galactarolactone (HMDB37199), all M+Na adduct                                                                                                                                                                                                                                                                                                                                                                                                                                                                                                                                                                                                                                                                                                                                                                                                                                                                                                                                                                                                                                                                                                                                                                                                                                                                                                                                                                                                                                                                                                                                                                                                                                                                                                               |
| 264.1807  | 210.7 | 2.120 | 1.628 | Hydroxyvalerylcarnitine (HMDB13132)                                                                                                                                                                                                                                                                                                                                                                                                                                                                                                                                                                                                                                                                                                                                                                                                                                                                                                                                                                                                                                                                                                                                                                                                                                                                                                                                                                                                                                                                                                                                                                                                                                                                                                                                                                                                                                                                         |
| 255.2109  | 356.3 | 2.071 | 1.556 | 18-Nor-4(19)81113-abietatetraene (HMDB41371)                                                                                                                                                                                                                                                                                                                                                                                                                                                                                                                                                                                                                                                                                                                                                                                                                                                                                                                                                                                                                                                                                                                                                                                                                                                                                                                                                                                                                                                                                                                                                                                                                                                                                                                                                                                                                                                                |
| 129.0658  | 55.3  | 2.056 | 1.475 | Dihydrothymine (HMDB00079), L-Cyclo(alanyl)glycyl (HMDB31547), Squamolone (HMDB29874)                                                                                                                                                                                                                                                                                                                                                                                                                                                                                                                                                                                                                                                                                                                                                                                                                                                                                                                                                                                                                                                                                                                                                                                                                                                                                                                                                                                                                                                                                                                                                                                                                                                                                                                                                                                                                       |
| 171.0638  | 272.7 | 2.056 | 1.383 | 34-Methyleneadipic acid (HMDB59756), Furaneol acetate (HMDB32966), Herierin IV (HMDB38761), 34-Dihydroxyphenylglycol (HMDB00318), Herierin III (HMDB38760)                                                                                                                                                                                                                                                                                                                                                                                                                                                                                                                                                                                                                                                                                                                                                                                                                                                                                                                                                                                                                                                                                                                                                                                                                                                                                                                                                                                                                                                                                                                                                                                                                                                                                                                                                  |
| 203.1278  | 254.8 | 2.034 | 1.724 | Oxalic acid dibutyl ester (HMDB40196), 2-Ethylsuberic acid (HMDB59708), 3-Methylazelaic acid (HMDB59754), R-2-Hydroxy-3-methylbutanoic acid 3-Methylbutanoyl (HMDB31510), Sebacic acid (HMDB00792), Heptylmalonic acid (HMDB59719)                                                                                                                                                                                                                                                                                                                                                                                                                                                                                                                                                                                                                                                                                                                                                                                                                                                                                                                                                                                                                                                                                                                                                                                                                                                                                                                                                                                                                                                                                                                                                                                                                                                                          |
| 1560.0019 | 436.0 | 2.011 | 2.676 | CL(18:2(9Z12Z)20:4(5Z8Z11Z14Z)22:6(4Z7Z10Z13Z16Z19Z)20:4(5Z8Z11Z14Z)) (HMDB58877), CL(18:2(9Z12Z)22:6(4Z7Z10Z13Z16Z19Z)20:4(5Z8Z11Z14Z)20:4(5Z8Z11Z14Z)) (HMDB58942), CL(18:2(9Z12Z)20:4(5Z8Z11Z14Z)20:4(5Z8Z11Z14Z)22:6(4Z7Z10Z13Z16Z19Z)) (HMDB58867), CL(20:4(5Z8Z11Z14Z)18:2(9Z12Z)20:4(5Z8Z11Z14Z)22:6(4Z7Z10Z13Z16Z19Z)) (HMDB59067), CL(20:4(5Z8Z11Z14Z)18:2(9Z12Z)22:6(4Z7Z10Z13Z16Z19Z)20:4(5Z8Z11Z14Z)) (HMDB59077), CL(20:4(5Z8Z11Z14Z)20:4(5Z8Z11Z14Z)22:6(4Z7Z10Z13Z16Z19Z)18:2(9Z12Z)) (HMDB59108)                                                                                                                                                                                                                                                                                                                                                                                                                                                                                                                                                                                                                                                                                                                                                                                                                                                                                                                                                                                                                                                                                                                                                                                                                                                                                                                                                                                            |

**Supplemental Table S2: Discriminating features between NPDR and PDR patients that were assigned tentative annotations with medium or high confidence level using xMSannotator**

Features were selected using PLS-DA (VIP  $\geq 2$ ) and were significantly associated ( $p < 0.05$ ) with PDR in linear regression analyses adjusting for age, sex, diabetes duration, and hemoglobin A1c. Fold change presented as PDR patients/NPDR patients. Features were annotated by xMSannotator with medium or high confidence. All metabolite matches are M+H adducts unless otherwise specified.

| <i>m/z</i> | Retention Time (seconds) | VIP   | Fold Change | HMDB Match (Chemical ID)                                                                                                                                                                                                                                                                                                                                                                                                                                                                                                                                                                                                                                                                                                                                                                                                                                                                                                                                                                                                                                                                                                                                                                                                                                                                                                                                                                                                                                                                                                                                                                                  |
|------------|--------------------------|-------|-------------|-----------------------------------------------------------------------------------------------------------------------------------------------------------------------------------------------------------------------------------------------------------------------------------------------------------------------------------------------------------------------------------------------------------------------------------------------------------------------------------------------------------------------------------------------------------------------------------------------------------------------------------------------------------------------------------------------------------------------------------------------------------------------------------------------------------------------------------------------------------------------------------------------------------------------------------------------------------------------------------------------------------------------------------------------------------------------------------------------------------------------------------------------------------------------------------------------------------------------------------------------------------------------------------------------------------------------------------------------------------------------------------------------------------------------------------------------------------------------------------------------------------------------------------------------------------------------------------------------------------|
| 307.1895   | 563                      | 3.004 | 0.291       | Capsiate (HMDB34780), 5-Carboxy-gamma-chromanol (HMDB12799)                                                                                                                                                                                                                                                                                                                                                                                                                                                                                                                                                                                                                                                                                                                                                                                                                                                                                                                                                                                                                                                                                                                                                                                                                                                                                                                                                                                                                                                                                                                                               |
| 447.3831   | 549.6                    | 2.993 | 0.558       | alpha-Tocopherolquinone (HMDB34408), Schleicherastatin 3 (HMDB35512), 13-Hydroxy-alpha-tocopherol (HMDB12559), Stigmastentriol (HMDB29607)                                                                                                                                                                                                                                                                                                                                                                                                                                                                                                                                                                                                                                                                                                                                                                                                                                                                                                                                                                                                                                                                                                                                                                                                                                                                                                                                                                                                                                                                |
| 414.3580   | 419.6                    | 2.976 | 1.323       | Heptadecanoyl carnitine (HMDB06210)                                                                                                                                                                                                                                                                                                                                                                                                                                                                                                                                                                                                                                                                                                                                                                                                                                                                                                                                                                                                                                                                                                                                                                                                                                                                                                                                                                                                                                                                                                                                                                       |
| 275.2010   | 397.5                    | 2.969 | 2.659       | (10Z14E16E)-101416-Octadecatrien-12-ynoic acid (HMDB35963), Nandrolone (HMDB02725), Rhodinyol phenylacetate (HMDB37191), Citronellyl alpha-toluate (HMDB37230), 1-Phenyl-13-dodecanedione (HMDB35579)                                                                                                                                                                                                                                                                                                                                                                                                                                                                                                                                                                                                                                                                                                                                                                                                                                                                                                                                                                                                                                                                                                                                                                                                                                                                                                                                                                                                     |
| 209.1904   | 423.8                    | 2.949 | 2.521       | (E)-610-Dimethyl-9-methylene-5-undecen-2-one (HMDB35862), 2-Decylfuran (HMDB32215), 2-Cyclotetradecen-1-one (HMDB39884)                                                                                                                                                                                                                                                                                                                                                                                                                                                                                                                                                                                                                                                                                                                                                                                                                                                                                                                                                                                                                                                                                                                                                                                                                                                                                                                                                                                                                                                                                   |
| 221.1900   | 420.9                    | 2.821 | 1.495       | Isoshyobunone (HMDB38193), Spathulenol+H2O:138 (HMDB36420), Humulenol I (HMDB38211), Epoxyguaiane (HMDB35645), 11-Copaen-4-ol (HMDB37395), (6Z9Z12Z)-6912-Pentadecatrien-2-one (HMDB39532), Bisacurool (HMDB38512), Calacone (HMDB38146), alpha-Bergamotenol (HMDB36402), Humulene epoxide II (HMDB38210), Preisocalamendiol (HMDB35391), beta-Betulenol (HMDB36788), 4-Nonylphenol (HMDB38982), Vetiverol (HMDB37811), 7(14)-Isodaucen-10-one (HMDB38160), alpha-Cyperol (HMDB35026), beta-Costol (HMDB35097), 315-Epoxy-6-caryophyllene (HMDB36793), 26-Di-tert-butyl-4-methylphenol (HMDB33826), Eremofukinone (HMDB38119), alpha-Santal-10-en-12-ol (HMDB34940), Acoragermacrone (HMDB37069), (R)-27(14)9-Bisabolatrien-11-ol (HMDB35739), Humuladienone (HMDB38208), Dihydroneootkatone (HMDB32220), Acorenone (HMDB35704), Italicene ether (HMDB40763), Humulene epoxide I (HMDB38209), Isospathulenol (HMDB34718), Fukinone (HMDB35793), Bisabolene oxide (HMDB38134), Cabreuva oxide D (HMDB59836), Isocyperol (HMDB35718), 15-Epoxy-4(14)-salvialene (HMDB38123), 2-trans6-trans-Farnesal (HMDB60356), Humulenol II (HMDB38212), 4(15)-Copaen-11-ol (HMDB37392), (3S6E)-6-Caryophyllen-15-al (HMDB36118), Nootkatol (HMDB13688), Aromadendrene epoxide (HMDB39711), trans-beta-Santalol (HMDB36717), Isoacalamone (HMDB35720), Apritone (HMDB36192), Epishyobunone (HMDB35306), Caryophyllene alpha-oxide (HMDB36789), (2R6S7S10Z)-beta-Santala-3(15)10-dien-12-ol (HMDB30232), beta-Santalol (HMDB36716), Acolamone (HMDB350200), 8alpha-3-Copaen-8-ol (HMDB36798), alpha-Valerenol (HMDB34661) |
| 444.3085   | 459.6                    | 2.790 | 0.552       | Dynorphin A (6-8) (HMDB12932)                                                                                                                                                                                                                                                                                                                                                                                                                                                                                                                                                                                                                                                                                                                                                                                                                                                                                                                                                                                                                                                                                                                                                                                                                                                                                                                                                                                                                                                                                                                                                                             |
| 800.6098   | 569.4                    | 2.780 | 0.847       | PE(22:1(13Z)18:1(11Z)) (HMDB09520), PE(18:1(11Z)22:1(13Z)) (HMDB09040), PE(22:1(13Z)18:1(9Z)) (HMDB09521), PE(20:1(11Z)20:1(11Z)) (HMDB09263), PE(20:2(11Z14Z)20:0) (HMDB09295), PE(18:1(9Z)22:1(13Z)) (HMDB09073), PE(16:1(9Z)24:1(15Z)) (HMDB08981), PE(18:022:2(13Z16Z)) (HMDB09008), PE(18:2(9Z12Z)22:0) (HMDB09105), PE(24:1(15Z)16:1(9Z)) (HMDB09749), PE(20:020:2(11Z14Z)) (HMDB09231), PE(22:018:2(9Z12Z)) (HMDB09489), PE(22:2(13Z16Z)18:0) (HMDB09552), PC(15:022:2(13Z16Z)) (HMDB07954), PC(22:2(13Z16Z)15:0) (HMDB08592),                                                                                                                                                                                                                                                                                                                                                                                                                                                                                                                                                                                                                                                                                                                                                                                                                                                                                                                                                                                                                                                                     |
| 162.1125   | 57.0                     | 2.767 | 1.222       | L-Carnitine (HMDB00062)                                                                                                                                                                                                                                                                                                                                                                                                                                                                                                                                                                                                                                                                                                                                                                                                                                                                                                                                                                                                                                                                                                                                                                                                                                                                                                                                                                                                                                                                                                                                                                                   |
| 800.6740   | 436.3                    | 2.692 | 1.758       | SM(d17:124:1(15Z)) (HMDB11696)                                                                                                                                                                                                                                                                                                                                                                                                                                                                                                                                                                                                                                                                                                                                                                                                                                                                                                                                                                                                                                                                                                                                                                                                                                                                                                                                                                                                                                                                                                                                                                            |
| 248.0488   | 61.8                     | 2.663 | 0.784       | Emtricitabine (HMDB15017)                                                                                                                                                                                                                                                                                                                                                                                                                                                                                                                                                                                                                                                                                                                                                                                                                                                                                                                                                                                                                                                                                                                                                                                                                                                                                                                                                                                                                                                                                                                                                                                 |
| 163.1158   | 53.4                     | 2.623 | 1.220       | L-Carnitine (HMDB00062) [M+H <sub>+</sub> ], (S1)-Methoxy-3-heptanethiol (HMDB32380)                                                                                                                                                                                                                                                                                                                                                                                                                                                                                                                                                                                                                                                                                                                                                                                                                                                                                                                                                                                                                                                                                                                                                                                                                                                                                                                                                                                                                                                                                                                      |

|           |       |       |       |                                                                                                                                                                                                                                                                                                                                                                                                                                                                                                                                                                                                                                                                                                                                                                                                                                                                            |
|-----------|-------|-------|-------|----------------------------------------------------------------------------------------------------------------------------------------------------------------------------------------------------------------------------------------------------------------------------------------------------------------------------------------------------------------------------------------------------------------------------------------------------------------------------------------------------------------------------------------------------------------------------------------------------------------------------------------------------------------------------------------------------------------------------------------------------------------------------------------------------------------------------------------------------------------------------|
| 241.1547  | 58.1  | 2.535 | 1.342 | Pirbuterol (HMDB15407)                                                                                                                                                                                                                                                                                                                                                                                                                                                                                                                                                                                                                                                                                                                                                                                                                                                     |
| 506.3618  | 419   | 2.531 | 1.174 | LysoPC(P-18:1(9Z)) (HMDB10408)                                                                                                                                                                                                                                                                                                                                                                                                                                                                                                                                                                                                                                                                                                                                                                                                                                             |
| 315.1778  | 563.8 | 2.471 | 0.589 | (-)-trans-Carveol glucoside (HMDB29849), (-)-trans-Carveol glucoside (HMDB29848), Perilloside A (HMDB38706)                                                                                                                                                                                                                                                                                                                                                                                                                                                                                                                                                                                                                                                                                                                                                                |
| 431.3156  | 454.3 | 2.439 | 0.783 | Barogenin (HMDB34403), 7 alpha-Hydroxy-3-oxo-4-cholestenol (HMDB12458), 25-Hydroxyvitamin D3-2623-lactol (HMDB60127), 24-Oxo-1alpha,25-dihydroxyvitamin D3 (HMDB60128), Australigenin (HMDB30066), MG(0:024:6(6Z9Z12Z15Z18Z21Z)0:0) (HMDB11560), MG(24:6(6Z9Z12Z15Z18Z21Z)0:00:0) (HMDB11590), Schidigeragenin C (HMDB36249)                                                                                                                                                                                                                                                                                                                                                                                                                                                                                                                                               |
| 309.1308  | 567.3 | 2.435 | 1.497 | 8-Acetylgelelolide (HMDB37772)                                                                                                                                                                                                                                                                                                                                                                                                                                                                                                                                                                                                                                                                                                                                                                                                                                             |
| 570.2570  | 418.8 | 2.424 | 0.729 | LysoPE(22:6(4Z7Z10Z13Z16Z19Z)0:0) (HMDB11526), LysoPE(0:022:6(4Z7Z10Z13Z16Z19Z)) (HMDB11496) [all M+Na-H adducts]                                                                                                                                                                                                                                                                                                                                                                                                                                                                                                                                                                                                                                                                                                                                                          |
| 247.2056  | 244.8 | 2.416 | 0.536 | Avocadiynofuran (HMDB30933), Ginsenoyne J (HMDB40373), Avocadienofuran (HMDB30926), Isoavocadienofuran (HMDB30927)                                                                                                                                                                                                                                                                                                                                                                                                                                                                                                                                                                                                                                                                                                                                                         |
| 566.2652  | 307.2 | 2.410 | 2.672 | Hemorphin-4 (HMDB59788)                                                                                                                                                                                                                                                                                                                                                                                                                                                                                                                                                                                                                                                                                                                                                                                                                                                    |
| 149.0447  | 280.5 | 2.389 | 1.344 | D-2-Hydroxyglutaric acid (HMDB00606), 2-Hydroxyglutarate (HMDB59655), 1-Propenyl propyl disulfide (HMDB41392), 3-Hydroxyglutaric acid (HMDB00428), Ribonolactone (HMDB01900), L-2-Hydroxyglutaric acid (HMDB00694), 2-Propenyl propyl disulfide (HMDB33912), Citramalic acid (HMDB00426), D-Xylono-15-lactone (HMDB11676), Methyl 3-methyl-1-butenyl disulfide (HMDB38890)                                                                                                                                                                                                                                                                                                                                                                                                                                                                                                 |
| 186.1124  | 57.5  | 2.365 | 1.413 | Pseudoecgonine (HMDB06348), Ecgonine (HMDB06548)                                                                                                                                                                                                                                                                                                                                                                                                                                                                                                                                                                                                                                                                                                                                                                                                                           |
| 112.9556  | 22.4  | 2.346 | 1.117 | 11-Dichloroethylene epoxide (HMDB60333), 22-Dichloroacetaldehyde (HMDB60357), Chloroacetyl chloride (HMDB60452)                                                                                                                                                                                                                                                                                                                                                                                                                                                                                                                                                                                                                                                                                                                                                            |
| 353.1564  | 384.2 | 2.336 | 1.141 | Coriandrone D (HMDB29972)                                                                                                                                                                                                                                                                                                                                                                                                                                                                                                                                                                                                                                                                                                                                                                                                                                                  |
| 287.1002  | 77.8  | 2.322 | 1.686 | 34-Dihydrodiol (HMDB13895), Phenytoin dihydrodiol (HMDB60866)                                                                                                                                                                                                                                                                                                                                                                                                                                                                                                                                                                                                                                                                                                                                                                                                              |
| 583.4102  | 567.2 | 2.292 | 0.894 | (3S3R5R6R)-78-Didehydro-36-epoxy-56-dihydro-beta-beta-carotene-35-diol (HMDB37794)                                                                                                                                                                                                                                                                                                                                                                                                                                                                                                                                                                                                                                                                                                                                                                                         |
| 265.1184  | 94.7  | 2.285 | 1.619 | di-Hydroxymelatonin (HMDB61136), Acetyl-N-formyl-5-methoxykynurenamine (HMDB04259), Alpha-N-Phenylacetyl-L-glutamine (HMDB06344)                                                                                                                                                                                                                                                                                                                                                                                                                                                                                                                                                                                                                                                                                                                                           |
| 239.2370  | 566.1 | 2.270 | 0.899 | Butyl dodecanoate (HMDB32065), Trimethyltridecanoic acid (HMDB02396), Hexadecanoate (n-C16:0) (HMDB60083), Dodecyl 2-methylpropanoate (HMDB36210), Ethyl tetradecanoate (HMDB34153), Palmitic acid (HMDB00220), Hexyl decanoate (HMDB32324), Isopalmitic acid (HMDB31068), Dodecyl butyrate (HMDB32249), Octyl octanoate (HMDB33166) [all M+H-H2O adducts]                                                                                                                                                                                                                                                                                                                                                                                                                                                                                                                 |
| 239.2370  | 566.1 | 2.270 | 0.899 | Hexadecenal (HMDB60482), 3-Methylcyclopentadecanone (HMDB34181), (-)-2-Dodecylcyclobutanone (HMDB37544)                                                                                                                                                                                                                                                                                                                                                                                                                                                                                                                                                                                                                                                                                                                                                                    |
| 497.3064  | 487.7 | 2.262 | 0.709 | (3b16b20R)-Pregn-5-ene-31620-triol 3-glucoside (HMDB41331), 3-alpha,20-alpha-Dihydroxy-5-beta-pregnane 3-glucuronide (HMDB10352), Pregnenediol-3-glucuronide (HMDB10318)                                                                                                                                                                                                                                                                                                                                                                                                                                                                                                                                                                                                                                                                                                   |
| 176.1030  | 56.8  | 2.250 | 1.295 | Citrulline (HMDB00904), Argininic acid (HMDB03148)                                                                                                                                                                                                                                                                                                                                                                                                                                                                                                                                                                                                                                                                                                                                                                                                                         |
| 1140.5300 | 489.6 | 2.213 | 0.803 | Iodipamide (HMDB15581)                                                                                                                                                                                                                                                                                                                                                                                                                                                                                                                                                                                                                                                                                                                                                                                                                                                     |
| 226.9516  | 532.9 | 2.205 | 0.620 | 25-Dichloro-4-oxohex-2-enedioate (HMDB60363)                                                                                                                                                                                                                                                                                                                                                                                                                                                                                                                                                                                                                                                                                                                                                                                                                               |
| 780.5544  | 449.1 | 2.199 | 1.608 | PC(18:1(11Z)18:4(6Z9Z12Z15Z)) (HMDB08075), PC(18:2(9Z12Z)18:3(6Z9Z12Z)) (HMDB08140), PC(16:1(9Z)20:4(5Z8Z11Z14Z)) (HMDB08015), PC(18:2(9Z12Z)18:3(9Z12Z15Z)) (HMDB08141), PC(14:1(9Z)22:4(7Z10Z13Z16Z)) (HMDB07922), PC(18:3(6Z9Z12Z)18:2(9Z12Z)) (HMDB08171), PC(14:022:5(7Z10Z13Z16Z19Z)) (HMDB07891), PC(14:022:5(4Z7Z10Z13Z16Z)) (HMDB07890), PC(22:5(4Z7Z10Z13Z16Z)14:0) (HMDB08656), PC(22:4(7Z10Z13Z16Z)14:1(9Z)) (HMDB08624), PC(16:020:5(5Z8Z11Z14Z17Z)) (HMDB07984), PC(22:5(7Z10Z13Z16Z19Z)14:0) (HMDB08689), PC(18:1(9Z)18:4(6Z9Z12Z15Z)) (HMDB08108), PC(18:4(6Z9Z12Z15Z)18:1(11Z)) (HMDB08235), PC(16:1(9Z)20:4(8Z11Z14Z17Z)) (HMDB08016), PC(20:4(5Z8Z11Z14Z)16:1(9Z)) (HMDB08430), PC(18:4(6Z9Z12Z15Z)18:1(9Z)) (HMDB08236), PC(20:4(8Z11Z14Z17Z)16:1(9Z)) (HMDB08463), PC(18:3(9Z12Z15Z)18:2(9Z12Z)) (HMDB08204), PC(20:5(5Z8Z11Z14Z17Z)16:0) (HMDB08495) |
| 267.0596  | 57.8  | 2.193 | 1.265 | Methoxybrassinin (HMDB33351), 4-Methoxybrassinin (HMDB40790)                                                                                                                                                                                                                                                                                                                                                                                                                                                                                                                                                                                                                                                                                                                                                                                                               |

|          |       |       |       |                                                                                                                                                                                                                                                                                                                                      |
|----------|-------|-------|-------|--------------------------------------------------------------------------------------------------------------------------------------------------------------------------------------------------------------------------------------------------------------------------------------------------------------------------------------|
| 579.2576 | 534.9 | 2.165 | 0.666 | Withaperuvin H (HMDB34061)                                                                                                                                                                                                                                                                                                           |
| 153.0659 | 63.4  | 2.129 | 1.875 | N1-Methyl-4-pyridone-3-carboxamide (HMDB04194), N1-Methyl-2-pyridone-5-carboxamide (HMDB04193)                                                                                                                                                                                                                                       |
| 236.1298 | 567.7 | 2.127 | 0.880 | Pandamarilactam 3x (HMDB33610)                                                                                                                                                                                                                                                                                                       |
| 288.1035 | 77.2  | 2.126 | 1.530 | 34-Dihydrodiol (HMDB13895) [M+H <sub>+</sub> ], Phenytoin dihydrodiol (HMDB60866) [M+H <sub>+</sub> ]                                                                                                                                                                                                                                |
| 145.0490 | 216.4 | 2.122 | 0.506 | Dimethyl fumarate (HMDB31257), 3-Methylglutaconic acid (HMDB00522), 3-Hydroxyadipic acid 36-lactone (HMDB29171), Maleic acid homopolymer (HMDB36232), Ethyl hydrogen fumarate (HMDB40207), (E)-2-Methylglutaconic acid (HMDB02266), 3-Hexenedioic acid (HMDB00393), trans-2-Hexenedioic acid (HMDB13311)                             |
| 539.2106 | 417.4 | 2.119 | 1.100 | Citrusin A (HMDB39230), Asticolorin A (HMDB30133), Diosbulbinoside F (HMDB36783)                                                                                                                                                                                                                                                     |
| 330.2272 | 29.5  | 2.119 | 0.669 | 6-Keto-decanoylcarnitine (HMDB13202)                                                                                                                                                                                                                                                                                                 |
| 273.2216 | 348.7 | 2.089 | 2.011 | 5alpha-Androst-16-en-3-one (HMDB34406), 5a-Androst-3-en-17-one (HMDB06046)                                                                                                                                                                                                                                                           |
| 257.2476 | 567.5 | 2.089 | 0.858 | Butyl dodecanoate (HMDB32065), Palmitic acid (HMDB00220), Hexadecanoate (n-C16:0) (HMDB60083), Octyl octanoate (HMDB33166), Dodecyl 2-methylpropanoate (HMDB36210), Ethyl tetradecanoate (HMDB34153), Trimethyltridecanoic acid (HMDB02396), Isopalmitic acid (HMDB31068), Dodecyl butyrate (HMDB32249), Hexyl decanoate (HMDB32324) |
| 304.1755 | 290.1 | 2.058 | 0.490 | Pimelylcarnitine (HMDB13328)                                                                                                                                                                                                                                                                                                         |

2
